# Supplementary material for: Renin-Angiotensin-Aldosterone System Inhibitors and Risk of Cancer: A Population-Based Cohort Study Using a Common Data Model
Source: MDPI journal article supplement (doi:10.3390/diagnostics12020263), 2022-01-21
Supplement: s1 [file s1]

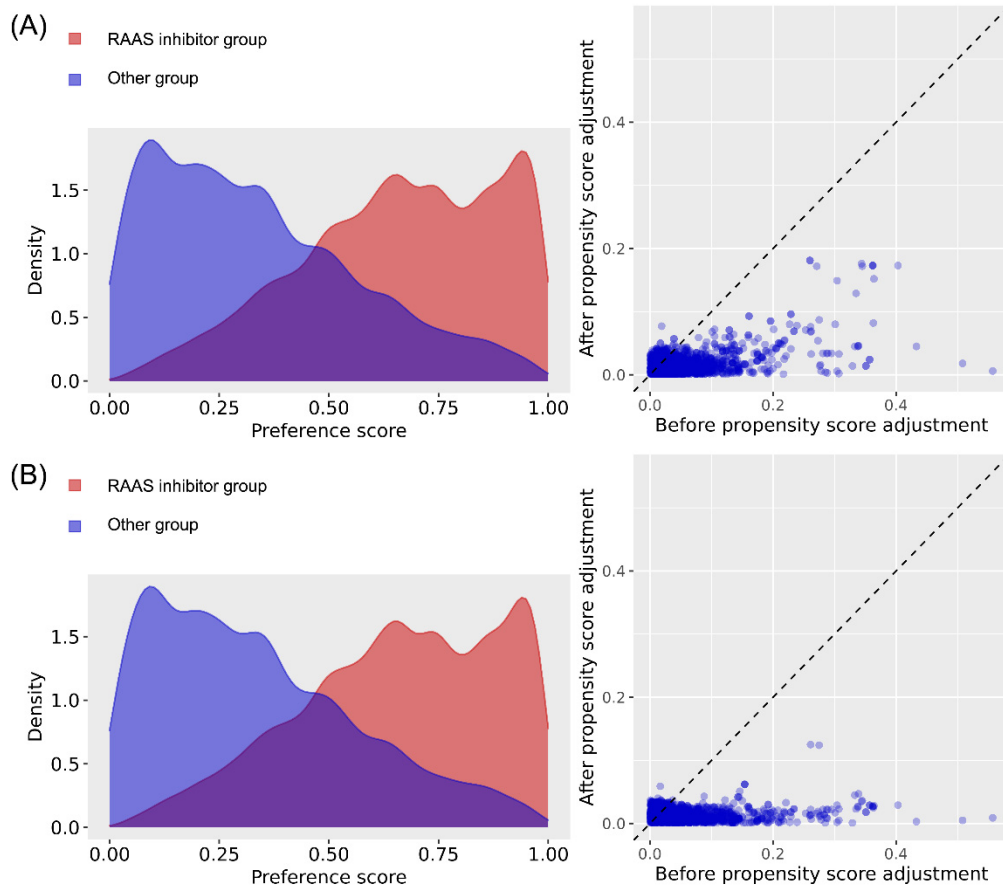

**Figure S1.** Balance between the groups before and after propensity score matching of AJOURMC cohort for all cancer occurrence.

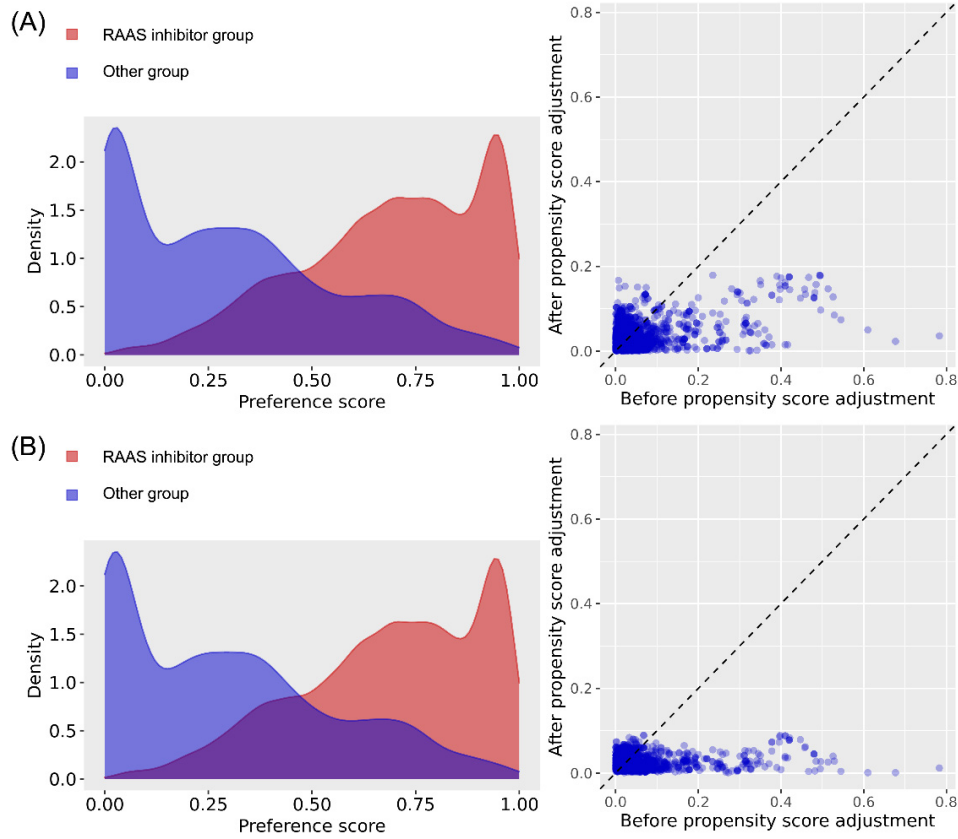

**Figure S2.** Balance between the groups before and after propensity score matching of DCMC cohort for all cancer occurrence.

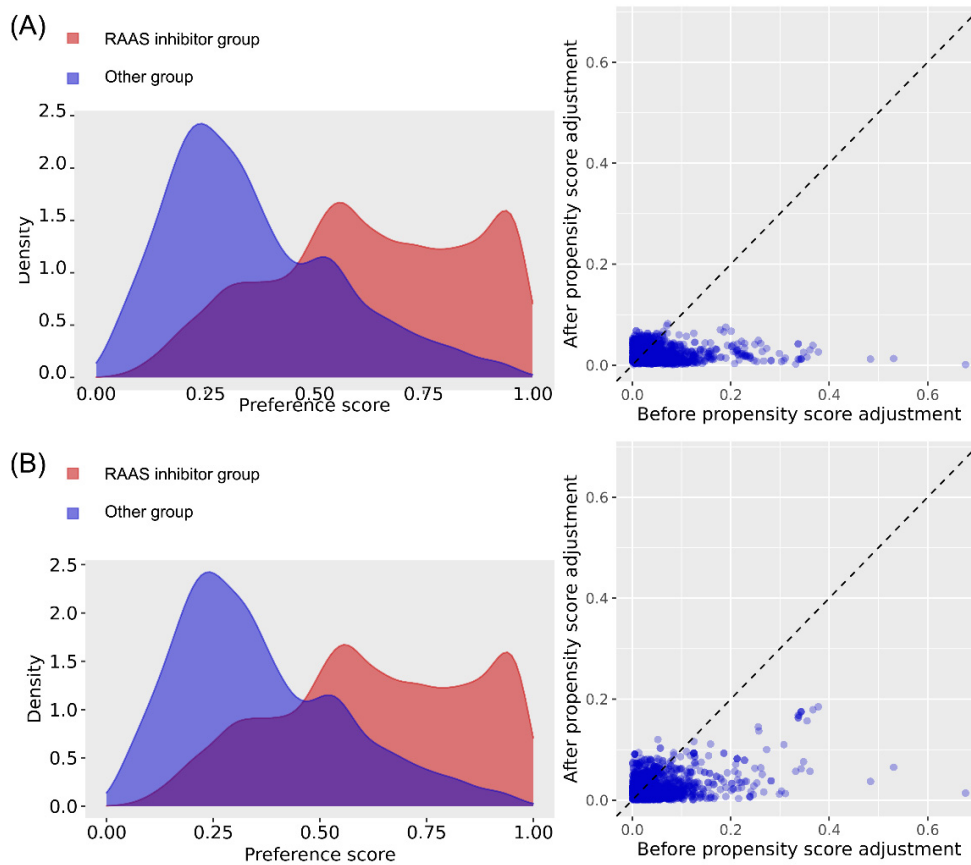

**Figure S3.** Balance between the groups before and after propensity score matching of KDH cohort for all cancer occurrence.

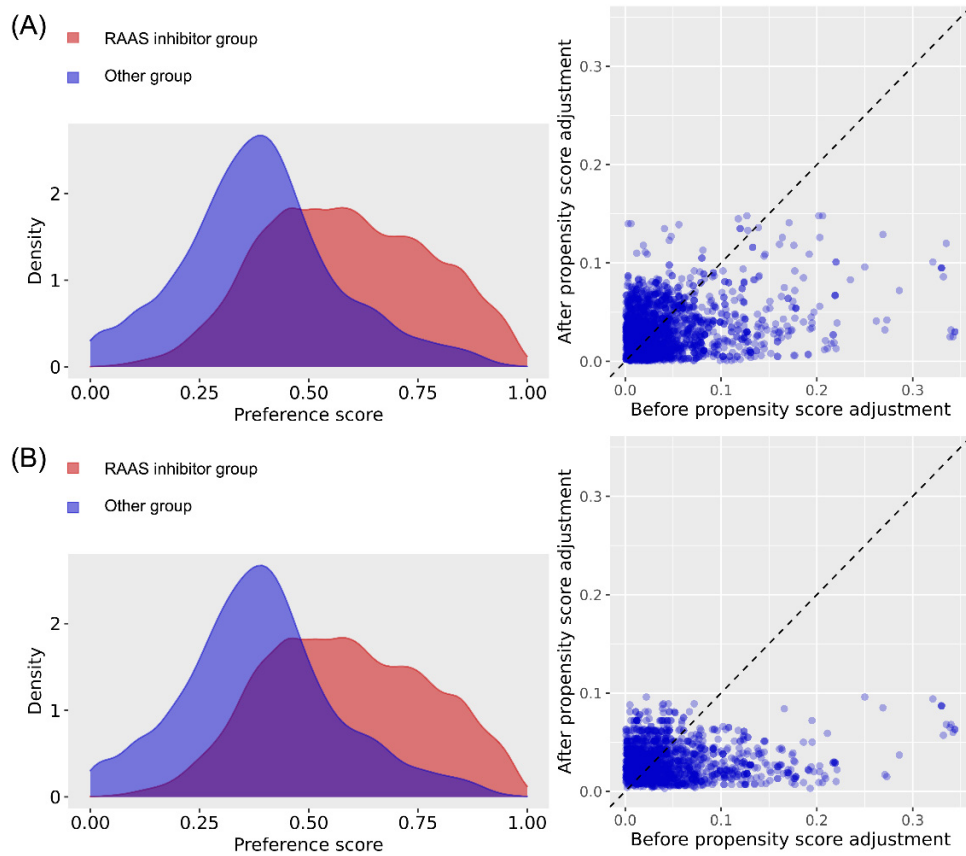

**Figure S4.** Balance between the groups before and after propensity score matching of KHNMC cohort for all cancer occurrence.

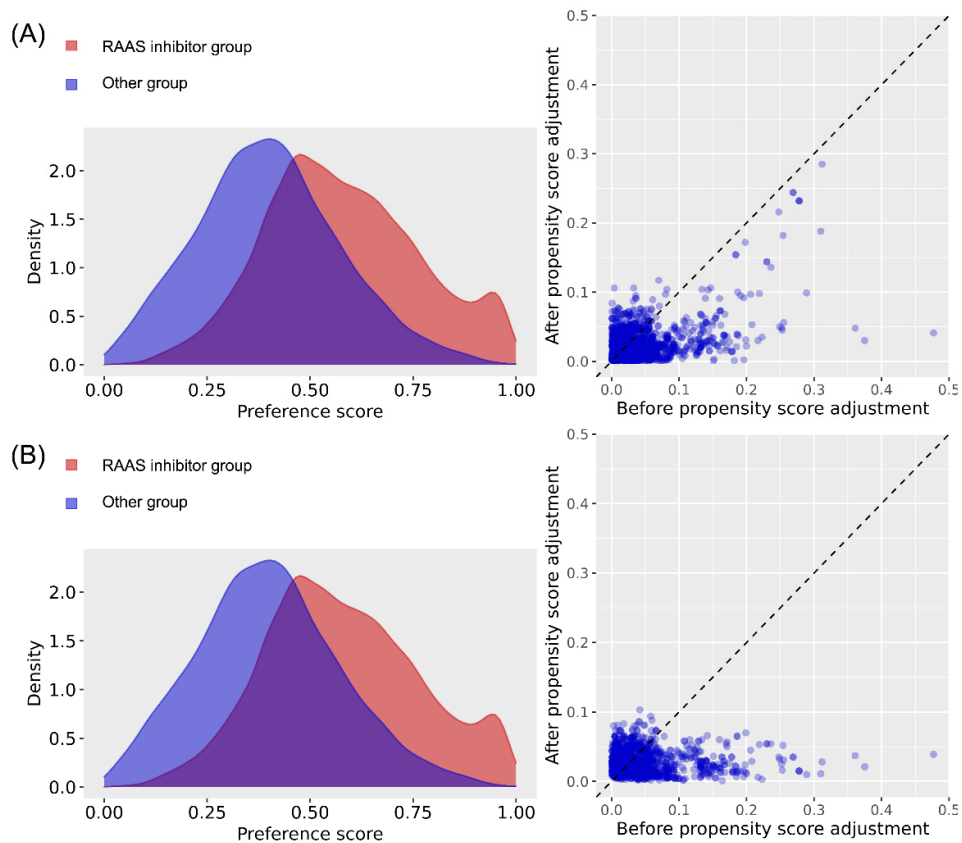

**Figure S5.** Balance between the groups before and after propensity score matching of KWMC cohort for all cancer occurrence.

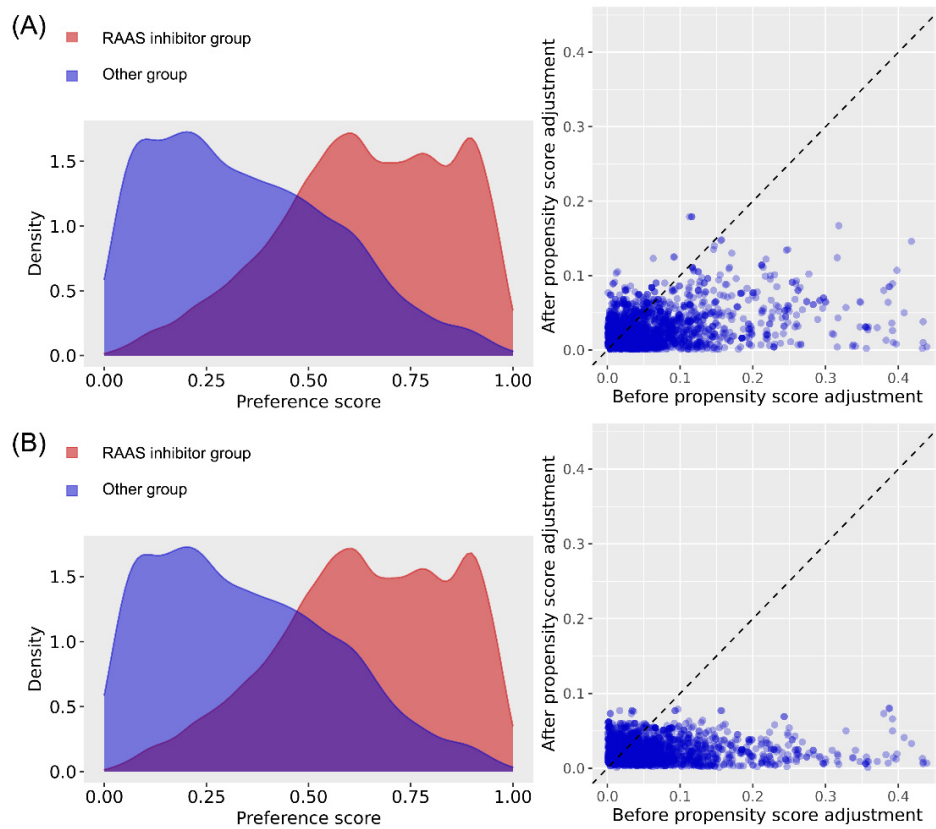

**Figure S6.** Balance between the groups before and after propensity score matching of PNUH cohort for all cancer occurrence.

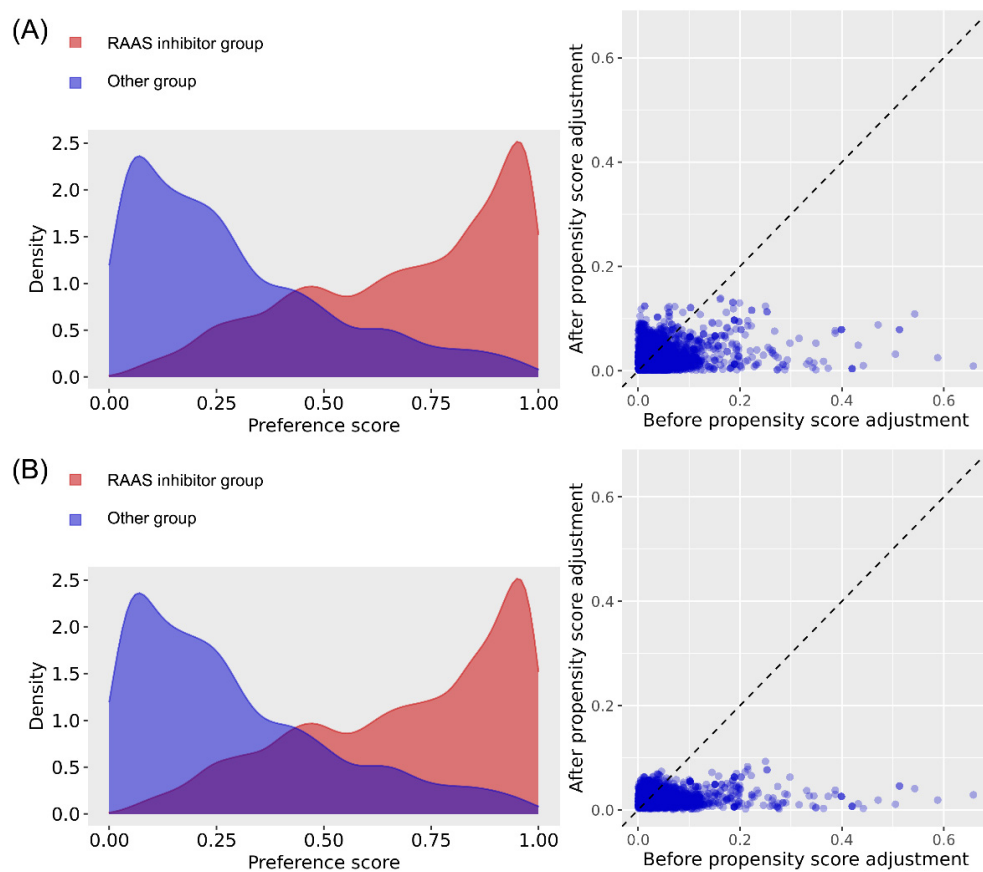

**Figure S7.** Balance between the groups before and after propensity score matching of WKUH cohort for all cancer occurrence.

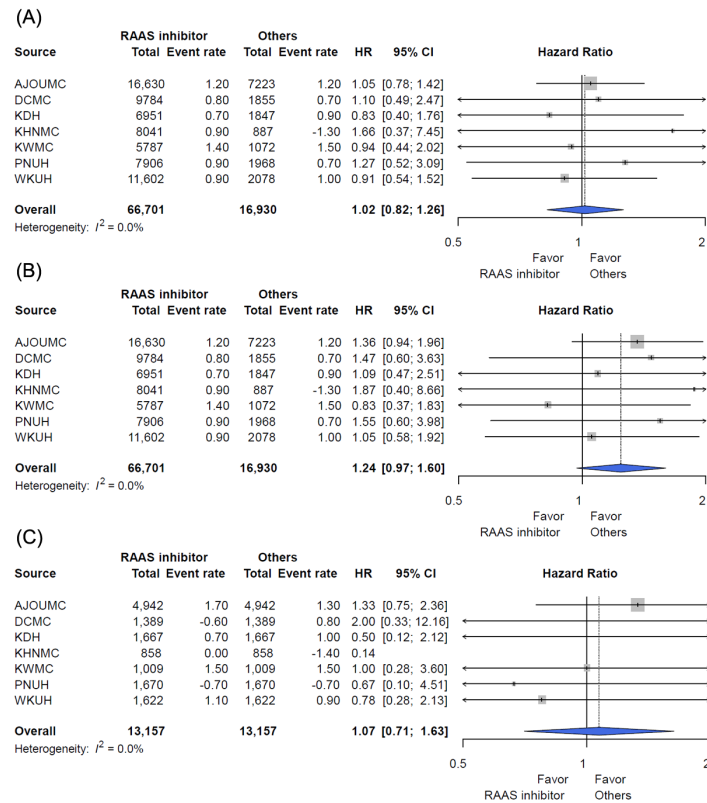

**Figure S8.** Incidence rate of breast cancer in the entire cohort (A) adjusted for sex and age, (B) propensity score stratified and (C) propensity-score matched population.

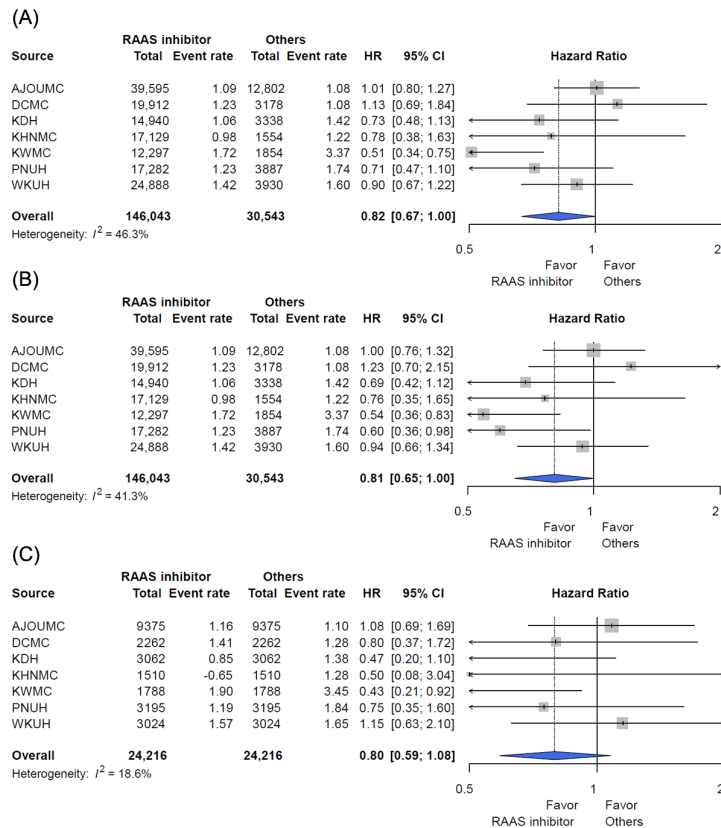

**Figure S9.** Incidence rate of colon cancer in the entire cohort (A) adjusted for sex and age, (B) propensity score stratified and (C) propensity-score matched population.

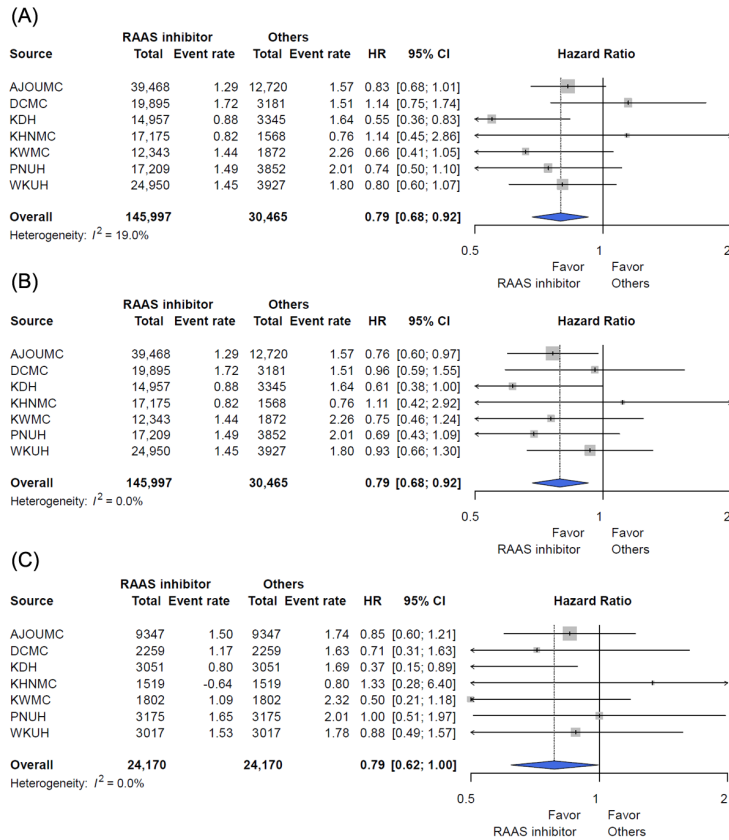

**Figure S10.** Incidence rate of gastric cancer in the entire cohort (A) adjusted for sex and age, (B) propensity score stratified and (C) propensity-score matched population.

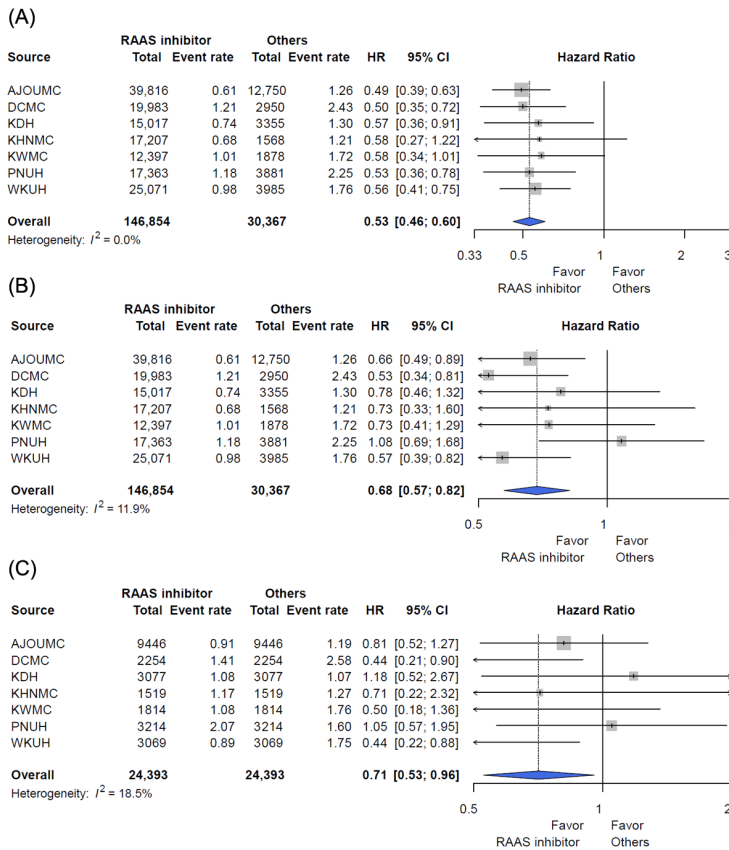

**Figure S11.** Incidence rate of liver cancer in the entire cohort (A) adjusted for sex and age, (B) propensity score stratified and (C) propensity-score matched population.

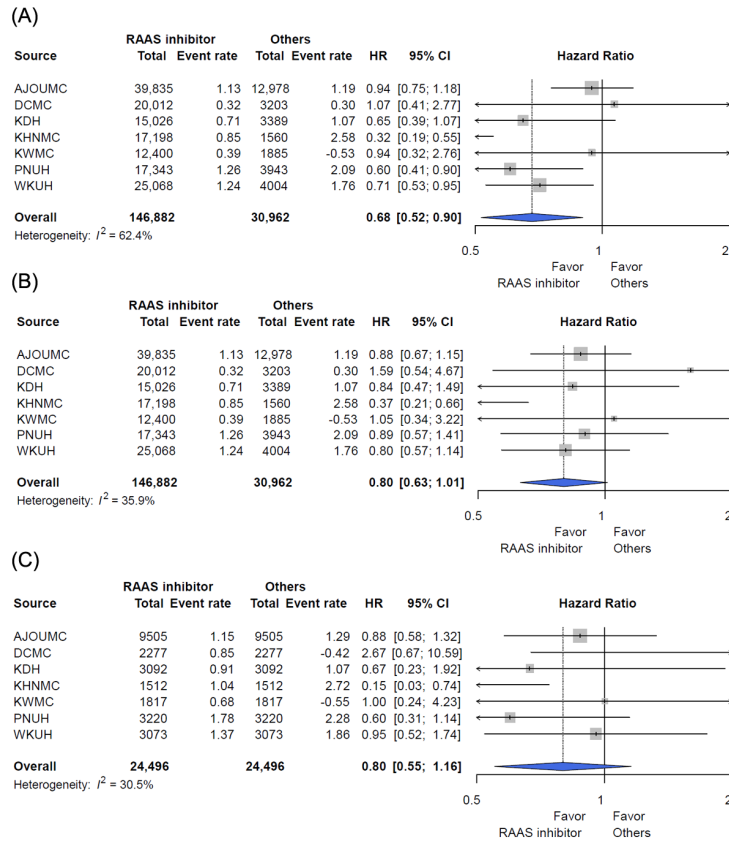

**Figure S12.** Incidence rate of lung cancer in the entire cohort (A) adjusted for sex and age, (B) propensity score stratified and (C) propensity-score matched population.

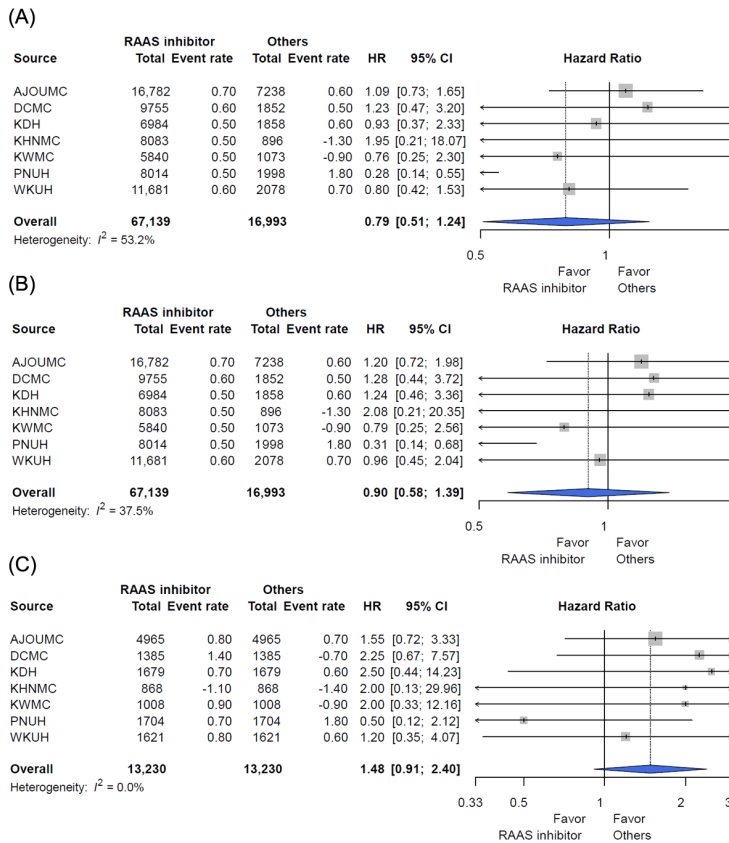

**Figure S13.** Incidence rate of gynecological cancer in the entire cohort (A) adjusted for sex and age, (B) propensity score stratified and (C) propensity-score matched population.

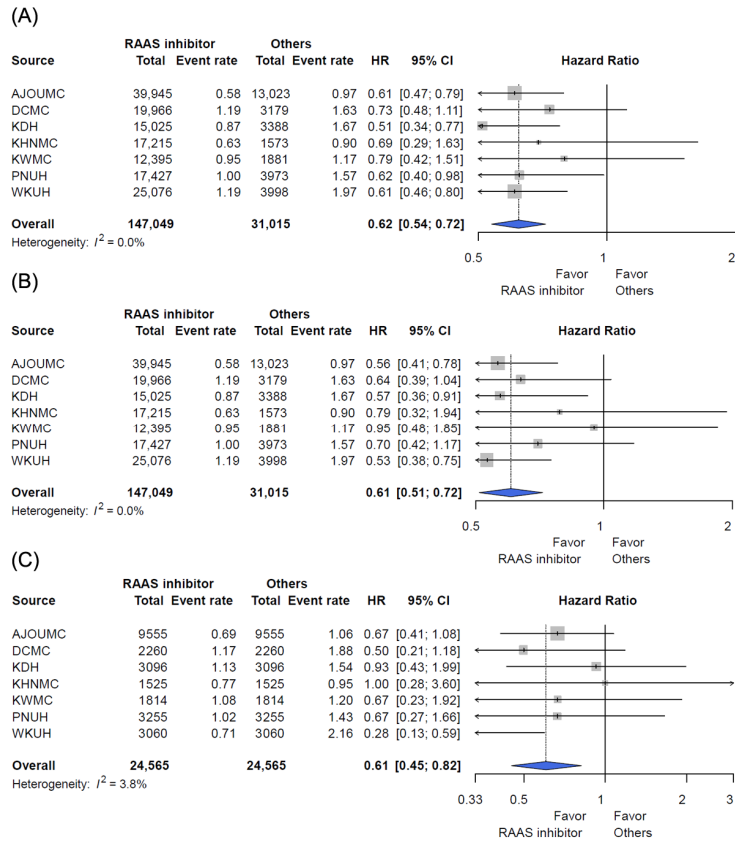

**Figure S14.** Incidence rate of pancreaticobiliary cancer in the entire cohort (A) adjusted for sex and age, (B) propensity score stratified and (C) propensity-score matched population.

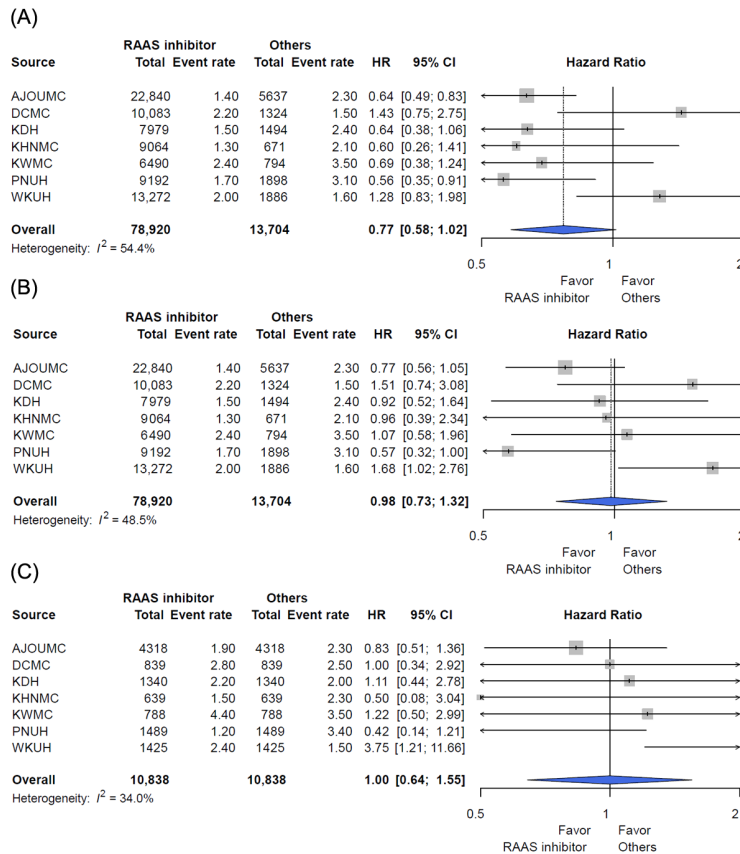

**Figure S15.** Incidence rate of prostate cancer in the entire cohort (A) adjusted for sex and age, (B) propensity score stratified and (C) propensity-score matched population.
